# Supplementary material for: Hidden ordered structure in the archetypical Fe(pyrazine)[Pt(CN) 4 ] spin-crossover porous coordination compound
Source: Royal Society of Chemistry journal article supplement (doi:10.1039/d2ce00895e), 2022-01-01
Supplement: d2ce00895e1.pdf [file d2ce00895e1.pdf]

# Supporting Information:

## Hidden ordered structure in the archetypical Fe(pyrazine)[Pt(CN)<sub>4</sub>] spin-crossover porous coordination compound

Ángel Fernández-Blanco,<sup>†</sup> Lorenzo A. Mariano,<sup>†</sup> Lucía Piñeiro-López,<sup>‡</sup> José Antonio Real,<sup>¶</sup> Jose Sanchez Costa,<sup>‡</sup> Roberta Poloni,<sup>\*,†</sup> and J. Alberto Rodríguez-Velamazán<sup>\*,§</sup>

<sup>†</sup>*Univ. Grenoble Alpes, SIMaP, Grenoble-INP, CNRS, F-38042, Grenoble, France*

<sup>‡</sup>*IMDEA Nanociencia, Faraday 9, Ciudad Universitaria de Cantoblanco, 28049 Madrid, Spain*

<sup>¶</sup>*Departamento de Química Inorgánica, Instituto de Ciencia Molecular (ICMol), Universidad de Valencia, 46980, Paterna, Spain.*

<sup>§</sup>*Instut Laue Langevin, 71 Avenue des Martyrs, CS 20156-38042, Grenoble, France*

E-mail: roberta.poloni@grenoble-inp.fr; velamazán@ill.eu

Table S1: Structural parameters used for depicting the structures (Fig. 1) and for the simulation of the expected powder diffraction patterns (Fig. 2) of Fe(pyrazine)[Pt(CN)<sub>4</sub>] in low-spin state with the pyrazine rings in disordered, perpendicular and parallel configurations.

| Configuration         | Disordered     | Perpendicular  | Parallel     |
|-----------------------|----------------|----------------|--------------|
| $\lambda$ (Å)         |                | 1.54           |              |
| Crystal system        | Tetragonal     | Tetragonal     | Orthorhombic |
| Space Group (No.)     | $P4/mmm$ (123) | $P4/mbm$ (127) | $Pmmm$ (47)  |
| $a$ (Å)               | 7.1786         | 10.1520        | 7.1786       |
| $b$ (Å)               | 7.1786         | 10.1520        | 7.1786       |
| $c$ (Å)               | 6.7741         | 6.7741         | 6.7741       |
| $V$ (Å <sup>3</sup> ) | 349.08         | 698.16         | 349.08       |
| Pt: x                 | 0.5            | 0.5            | 0.5          |
| y                     | 0.5            | 0.5            | 0.5          |
| z                     | 0.5            | 0.5            | 0.5          |
| Fe: x                 | 0              | 0              | 0            |
| y                     | 0              | 0.5            | 0            |
| z                     | 0.5            | 0.5            | 0.5          |
| N(1): x               | 0              | 0              | 0            |
| y                     | 0              | 0.5            | 0            |
| z                     | 0.79800        | 0.79800        | 0.79800      |
| N(2): x               | 0.19400        | 0.19400        | 0.19400      |
| y                     | 0.19400        | 0.5            | 0.19400      |
| z                     | 0.5            | 0.5            | 0.5          |
| C(1): x               | 0.31200        | 0.31200        | 0.31200      |
| y                     | 0.31200        | 0.5            | 0.31200      |
| z                     | 0.5            | 0.5            | 0.5          |
| C(2): x               | 0              | 0.08250        | 0            |
| y                     | 0.16500        | 0.58250        | 0.16500      |
| z                     | 0.89000        | 0.89000        | 0.89000      |
| H / D: x              | 0              | 0.13745        | 0            |
| y                     | 0.27490        | 0.63745        | 0.27490      |
| z                     | 0.81780        | 0.81780        | 0.81780      |

## Computational details

The DFT calculations were performed with the QuantumESPRESSO (QE) package<sup>S1-S3</sup> (v.6.4) within the generalized gradient approximation of Perdew, Burke and Ernzerhof (PBE)<sup>S4</sup> and long-range interactions described with the semiempirical approach proposed by Grimme (PBE+D2).<sup>S5,S6</sup> We employ the pseudopotentials from Garrity-Bennet-Rabe-Vanderbilt library (GBRV).<sup>S7</sup> The convergence threshold on forces is 0.0001 Ry/Bohr and the wavefunctions and charge density cutoffs are set to 100 Ry and 1000 Ry, respectively. These are carefully chosen to obtain converged phonon frequencies. To describe both the perpendicular and parallel orientation a supercell with lattice parameter  $a''=\sqrt{2}a$  and  $b''=\sqrt{2}b$  was used, with  $a$ ,  $b$  and  $c$  the lattice parameters of the primitive cell. The PBE+D2 lattice parameters are  $a''=b''=10.1\text{ \AA}$  and  $c''=6.7\text{ \AA}$ . The Brioullin zone is sampled using  $3\times 3\times 3$  Monkhorst-Pack k-points grid.

The vibrational contributions to the enthalpy and entropy are computed using eqs. 2 and 3 of the main text. The phonon frequencies  $\{\nu_i\}$  for perpendicular and parallel configuration in LS and HS are obtained by diagonalizing the dynamical matrix by employing the ph.x package implemented in Quantum Espresso. The harmonic interatomic force constants are computed using density functional perturbation theory.<sup>S8,S9</sup> The values of  $\Delta E_{vib}$  and  $\Delta S_{vib}$  that we present in the main text are obtained using the corresponding  $E_{vib}$  and  $S_{vib}$ . In the case of the disordered configuration, the average of  $E_{vib}$  and  $S_{vib}$  computed between the parallel and perpendicular configuration of the corresponding spin state, is taken.

We note that we obtain one negative frequency for the LS parallel case and for the HS perpendicular configuration, at  $-8.9\text{ cm}^{-1}$  and  $-27.8\text{ cm}^{-1}$ , respectively. Because the negative frequency is not counted in the summation of eqs. 2 and 3, one expects an underestimation of the vibrational entropy and enthalpy in these cases. Thus, in the two cases mentioned above we add one frequency in the low and one the intermediate energy range in two separate calculations and then compute the average. The corresponding values are indicated with an asterisk in Table 1. We add one frequency at  $10\text{ cm}^{-1}$  (right after the three trans-

lational modes) and then one at  $500 \text{ cm}^{-1}$  (right before the internal modes associated with the pyrazine). We stress here that if we take the values of vibrational energy and entropy computed as they are, i.e. without adding any new frequency, the final results on the value of  $T_{1/2}$  reported in the main article negligibly changes (by less than one K).

To evaluate  $\Delta E_{ad}$ , we use DFT within the Hubbard U-corrected density approach scheme, which has been recently proposed and tested by some of us.<sup>S10</sup> This method exploits the capabilities of the Hubbard  $U$ -correction method in DFT in improving the description of localized d electrons (more strongly affected by the self-interaction error in standard PBE) and at the same time removes the systematic bias toward high spin observed in Fe(II) complexes when the fully self-consistent PBE+U approach is used.<sup>S11</sup> In this work we adopt the linear-response approach proposed by Cococcioni *et al.*<sup>S12</sup> to compute the Hubbard parameter  $U$  for the iron site in the unit cell and we obtain 7.29 eV for HS and 8.87 eV for LS. The values of adiabatic energy differences reported in Table S2 and in the main paper are computed on the relaxed PBE+D2-geometries by employing the Hubbard U-density corrected approach that we name PBE[ $U$ ], i.e. by taking the PBE+U total energy contribution and removing the Hubbard term as explained in detail in ref.<sup>S10</sup> (we stress that no D2 term is used for this set of calculations).

Table S2: Adiabatic energy and vibrational energy and entropy for the three configurations (parallel, perpendicular and disordered) in HS and LS. \*Average value between one frequency added at low and one at high energy. The error is also reported. The label diso (*disordered*) refers to the average between parallel and perpendicular.

|                                                       |                                                         | Perpendicular           | Parallel                | Disordered (average) |
|-------------------------------------------------------|---------------------------------------------------------|-------------------------|-------------------------|----------------------|
| HS                                                    | $E_{ad}$ (kJ mol <sup>-1</sup> )                        | -890367.87373           | -890364.31075           | -890366.09224        |
|                                                       | $E_{vib}$ (kJ mol <sup>-1</sup> )                       | *339.02486<br>±0.285385 | 338.61891               | 338.82188            |
|                                                       | $S_{vib}$ (J mol <sup>-1</sup> K <sup>-1</sup> )        | *285.41634<br>±7.655215 | 286.28380               | 285.85007            |
| LS                                                    | $E_{ad}$ (kJ mol <sup>-1</sup> )                        | -890403.00375           | -890402.46490           | -890402.73433        |
|                                                       | $E_{vib}$ (kJ mol <sup>-1</sup> )                       | 346.87958               | *346.92117<br>±0.285385 | 346.90038            |
|                                                       | $S_{vib}$ (J mol <sup>-1</sup> K <sup>-1</sup> )        | 222.21025               | *223.87080<br>±7.655215 | 223.04053            |
| difference between HS (diso) -<br>LS (perp/para/diso) | $\Delta E_{ad}$ (kJ mol <sup>-1</sup> )                 | 36.91151                | 36.37266                | 36.64209             |
|                                                       | $\Delta E_{vib}$ (kJ mol <sup>-1</sup> )                | -8.05770                | -8.09929                | -8.07850             |
|                                                       | $\Delta S_{vib}$ (J mol <sup>-1</sup> K <sup>-1</sup> ) | 63.63982                | 61.97927                | 62.80954             |

## References

- (S1) Giannozzi, P.; Baroni, S.; Bonini, N.; Calandra, M.; Car, R.; Cavazzoni, C.; Ceresoli, D.; Chiarotti, G. L.; Cococcioni, M.; Dabo, I.; Corso, A. D.; de Gironcoli, S.; Fabris, S.; Fratesi, G.; Gebauer, R.; Gerstmann, U.; Gougoussis, C.; Kokalj, A.; Lazzeri, M.; Martin-Samos, L.; Marzari, N.; Mauri, F.; Mazzarello, R.; Paolini, S.; Pasquarello, A.; Paulatto, L.; Sbraccia, C.; Scandolo, S.; Sclauzero, G.; Seitsonen, A. P.; Smogunov, A.; Umari, P.; Wentzcovitch, R. M. QUANTUM ESPRESSO: a modular and open-source software project for quantum simulations of materials. *Journal of Physics: Condensed Matter* **2009**, *21*, 395502.
- (S2) Giannozzi, P.; Andreussi, O.; Brumme, T.; Bunau, O.; Nardelli, M. B.; Calandra, M.; Car, R.; Cavazzoni, C.; Ceresoli, D.; Cococcioni, M.; Colonna, N.; Carnimeo, I.; Corso, A. D.; de Gironcoli, S.; Delugas, P.; DiStasio, R. A.; Ferretti, A.; Floris, A.; Fratesi, G.; Fugallo, G.; Gebauer, R.; Gerstmann, U.; Giustino, F.; Gorni, T.; Jia, J.; Kawamura, M.; Ko, H.-Y.; Kokalj, A.; Küçükbenli, E.; Lazzeri, M.; Marsili, M.; Marzari, N.; Mauri, F.; Nguyen, N. L.; Nguyen, H.-V.; de-la Roza, A. O.; Paulatto, L.; Poncé, S.; Rocca, D.; Sabatini, R.; Santra, B.; Schlipf, M.; Seitsonen, A. P.; Smogunov, A.; Timrov, I.; Thonhauser, T.; Umari, P.; Vast, N.; Wu, X.; Baroni, S. Advanced capabilities for materials modelling with Quantum ESPRESSO. *Journal of Physics: Condensed Matter* **2017**, *29*, 465901.
- (S3) Giannozzi, P.; Baseggio, O.; Bonfá, P.; Brunato, D.; Car, R.; Carnimeo, I.; Cavazzoni, C.; de Gironcoli, S.; Delugas, P.; Ruffino, F. F.; Ferreti, A.; Mazari, N.; Timrov, I.; Urru, A.; Baroni, S. QUANTUM ESPRESSO toward the exascale. *Journal of Chemical Physics* **2020**, *152*, 154105–1 – 154105–11.
- (S4) Perdew, J. P.; Ernzerhof, M.; Burke, K. Rationale for mixing exact exchange with density functional approximations. *The Journal of Chemical Physics* **1996**, *105*, 9982–9985.

- (S5) Grimme, S. Semiempirical GGA-type density functional constructed with a long-range dispersion correction. *Journal of Computational Chemistry* **2006**, *27*, 1787–1799.
- (S6) Grimme, S.; Hansen, A.; Brandenburg, J. G.; Bannwarth, C. Dispersion-Corrected Mean-Field Electronic Structure Methods. *Chemical Reviews* **2016**, *116*, 5105–5154, PMID: 27077966.
- (S7) Garrity, K. F.; Bennett, J. W.; Rabe, K. M.; Vanderbilt, D. Pseudopotentials for high-throughput DFT calculations. *Computational Materials Science* **2014**, *81*, 446–452.
- (S8) Baroni, S.; de Gironcoli, S.; Dal Corso, A.; Giannozzi, P. Phonons and related crystal properties from density-functional perturbation theory. *Rev. Mod. Phys.* **2001**, *73*, 515–562.
- (S9) Gonze, X.; Lee, C. Dynamical matrices, Born effective charges, dielectric permittivity tensors, and interatomic force constants from density-functional perturbation theory. *Phys. Rev. B* **1997**, *55*, 10355–10368.
- (S10) Mariano, L. A.; Vlasisavljevich, B.; Poloni, R. Improved Spin-State Energy Differences of Fe(II) Molecular and Crystalline Complexes via the Hubbard U-Corrected Density. *Journal of Chemical Theory and Computation* **2021**, *17*, 2807–2816.
- (S11) Mariano, L. A.; Vlasisavljevich, B.; Poloni, R. Biased Spin-State Energetics of Fe(II) Molecular Complexes within Density-Functional Theory and the Linear-Response Hubbard U Correction. *Journal of Chemical Theory and Computation* **2020**, *16*, 6755–6762.
- (S12) Cococcioni, M.; de Gironcoli, S. Linear response approach to the calculation of the effective interaction parameters in the LDA+U method. *Physical Review B* **2005**, *71*.
